# Supplementary material
Source: PubMed Central journal article supplement (PMC8900281)
Supplement: bloodBLD2020008493-suppl1.pdf [file bloodBLD2020008493-suppl1.pdf]

# Supplemental Figure 1.

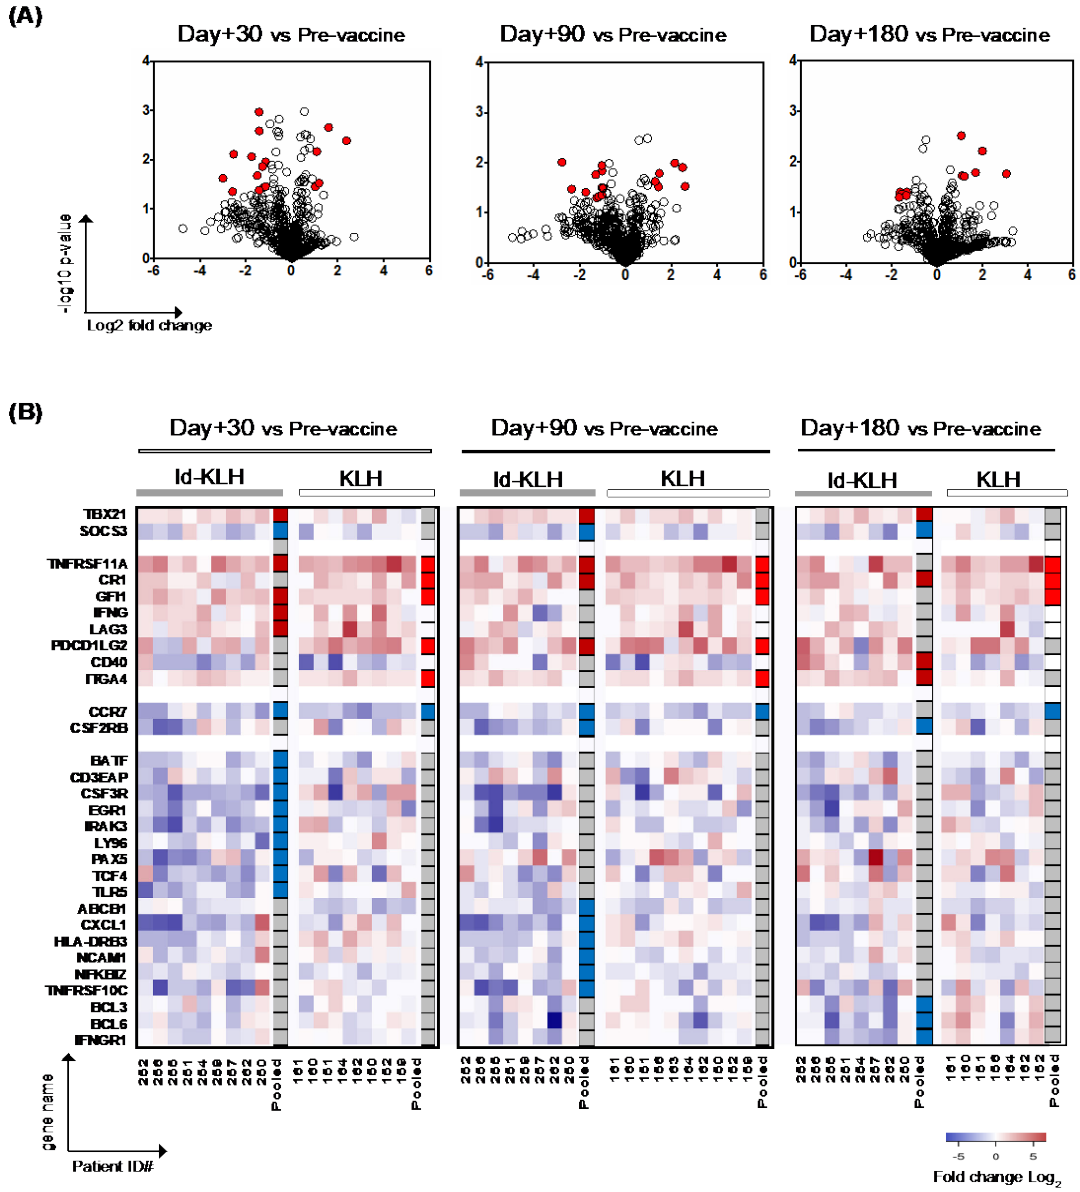

Supplemental Figure 1. Differential CD4<sup>+</sup> T cells immune gene expression between vaccine and control vaccine patients.

(A) Volcano plots illustrate the Log<sub>2</sub> fold change in gene expression (x-axis) and paired P values from student t tests between pre-vaccine [T0] and Id-KLH post-vaccine samples [T30, T90, and T180] (y-axis). Differentially expressed genes [ p < 0.05 and Log<sub>2</sub> fold-change > 2 or < -1/2] are indicated in red. (B) Heatmap displaying expression of 30 differentially expressed genes, as defined in (A). Pooled results for all patients are shown for each gene in the column to the far right for each treatment arm. Pooled results are classified as significantly upregulated (red), significantly down-regulated (blue) or no significant change (gray).

## Supplemental Figure 2.

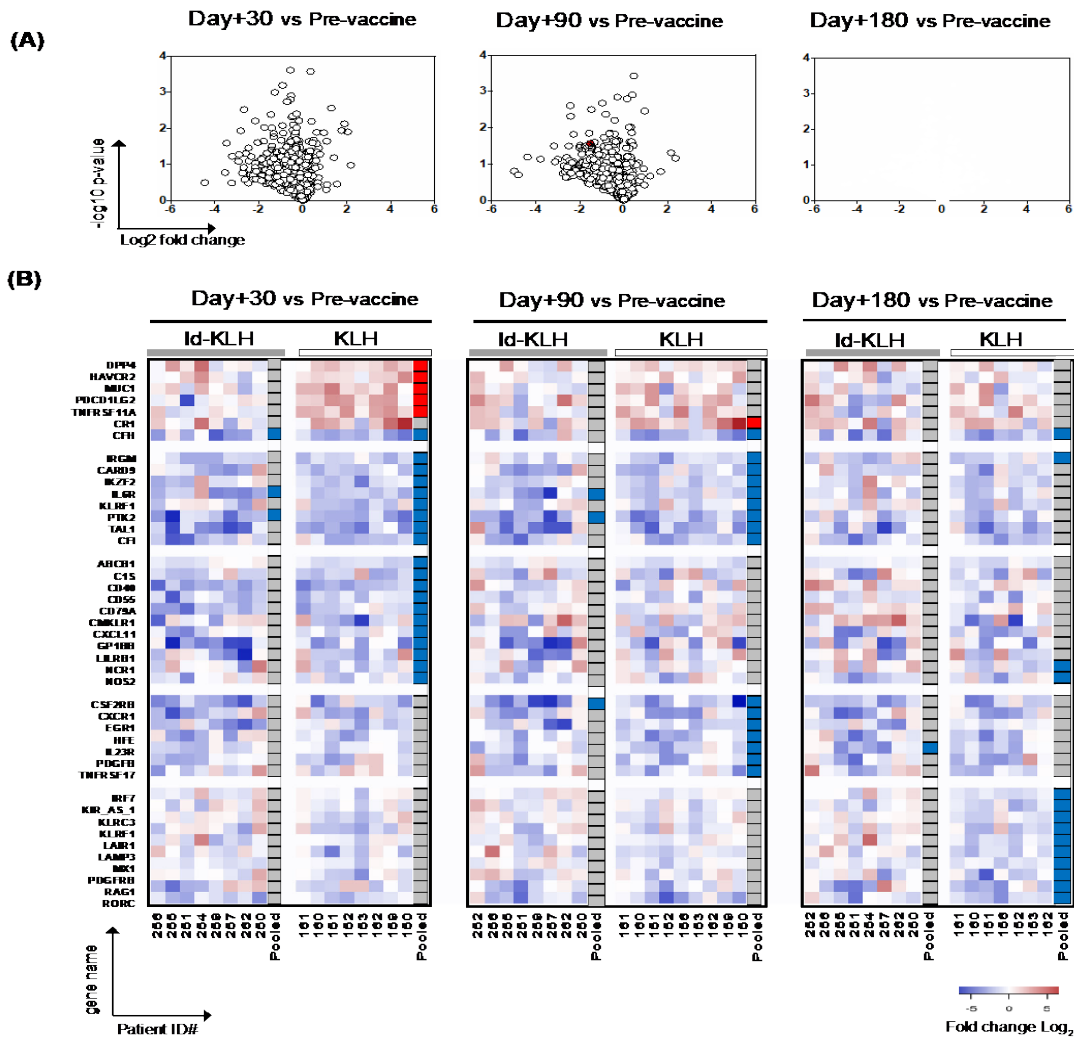

Supplemental Figure 2. Differential CD8<sup>+</sup> T cells immune gene expression between vaccine and control vaccine patients.

CD8 T cells were isolated from PBMC obtained pre- (T0) and at three time points post-vaccine [30 (T30), 90 (T90), and 180 (T180) days after activated T cell infusion] from 16 patients (8 patients treated with Id-KLH and 8 patients treated with KLH control). Gene expression profiling was batched, performed by NanoString and post-vaccine results for each patient were compared against corresponding T0 pre-vaccine samples. (A) Volcano plots illustrate the Log<sub>2</sub> fold change in gene expression (x-axis) and paired P values from student t tests between pre-vaccine [T0] and KLH post-vaccine samples [T30, T90, and T180] (y-axis). Differentially expressed genes [ p < 0.05 and Log<sub>2</sub> fold-change > 2 or < -1/2] are indicated in red. (B) Heatmap displaying expression of 43 differentially expressed genes, as defined in (A). Pooled results for all patients are shown for each gene in the column to the far right for each treatment arm. Pooled results are classified as significantly upregulated (red), significantly down-regulated (blue) or no significant change (gray).

### Supplemental Figure 3.

(A)

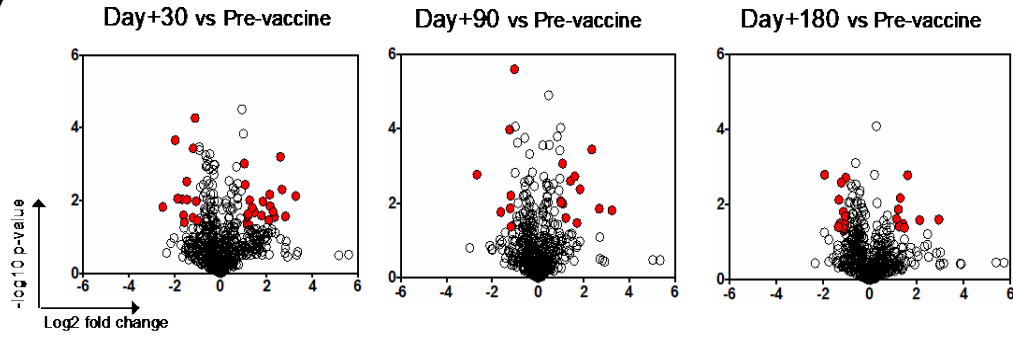

(B)

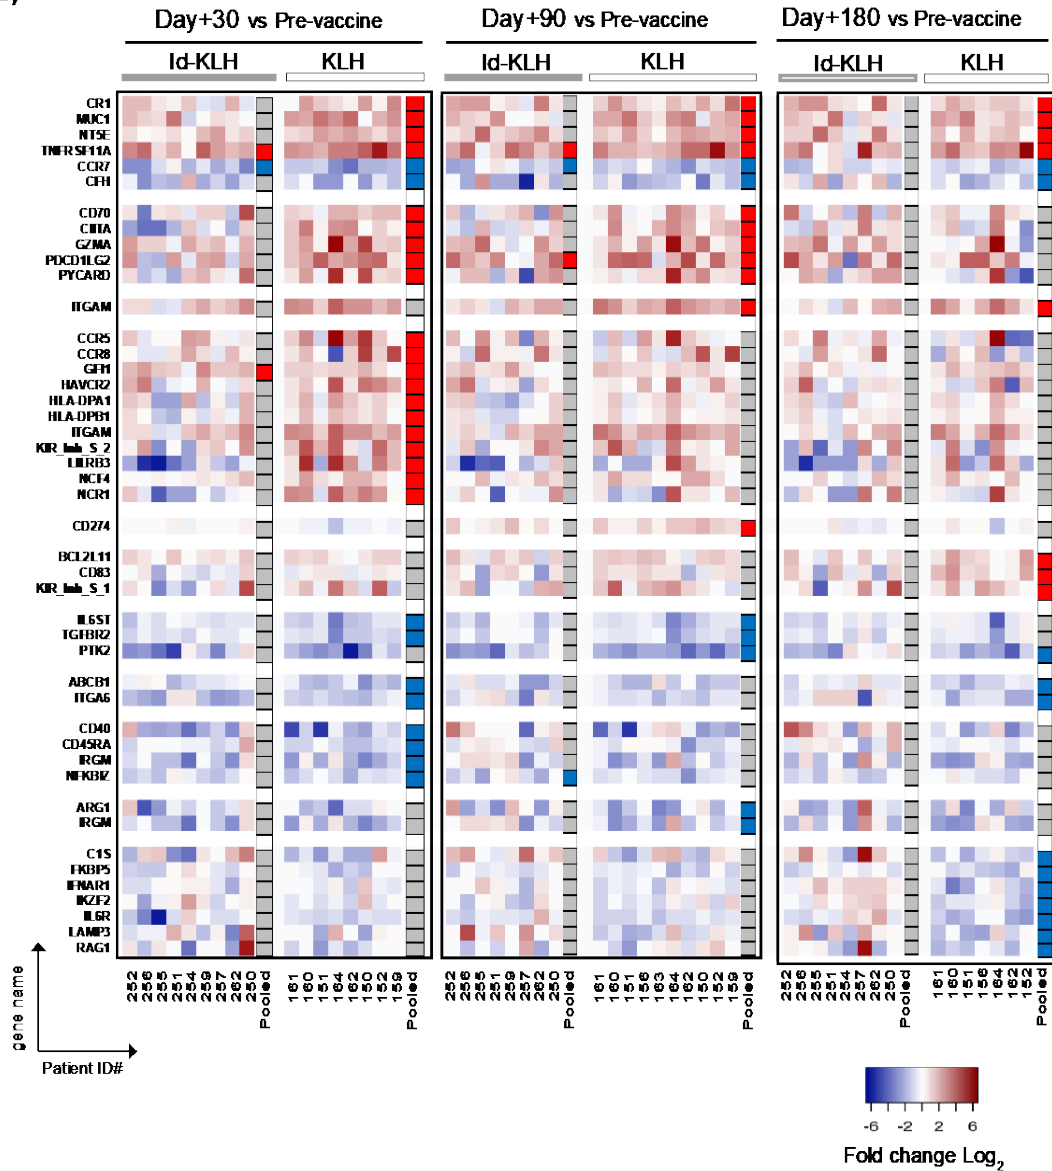

Supplemental Figure 3. Differential CD4<sup>+</sup> T cells immune gene expression between vaccine and control vaccine patients.

(A) Volcano plots illustrate the Log<sub>2</sub> fold change in gene expression (x-axis) and paired P values from student t tests between pre-vaccine [T0] and KLH post-vaccine samples [T30, T90, and T180] (y-axis). Differentially expressed genes [ p < 0.05 and Log<sub>2</sub> fold-change > 2 or < -1/2] are indicated in red. (B) Heatmap displaying expression of 47 differentially expressed genes, as defined in (A). Pooled results for all patients are shown for each gene in the column to the far right for each treatment arm. Pooled results are classified as significantly upregulated (red), significantly down-regulated (blue) or no significant change (gray).

## Supplementary Figure 4.

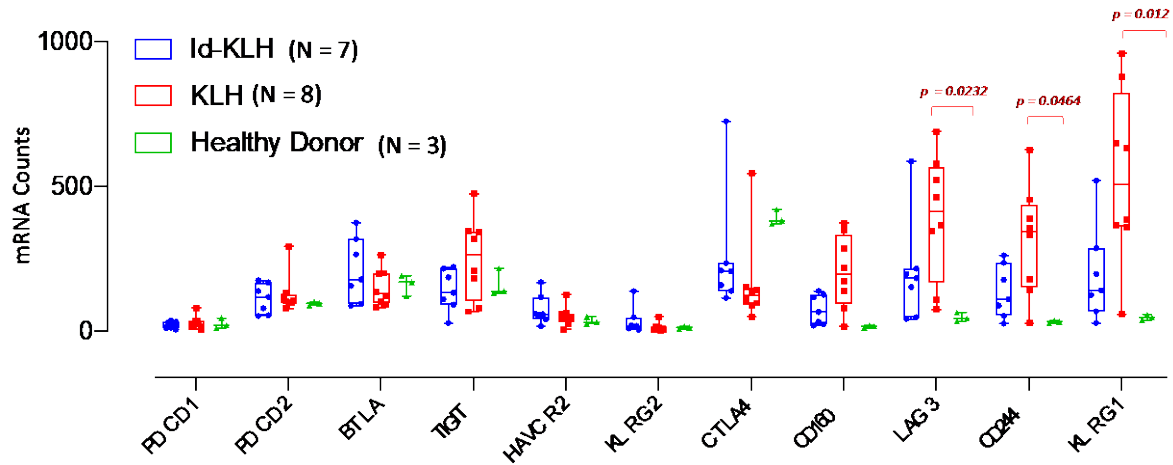

Supplementary Figure 4. CD8+ T cells from patients treated with KLH control or Id-KLH vaccine exhibited significantly greater mRNA expression of multiple exhaustion markers compared with healthy donors at baseline. Comparisons of mRNA expression levels for individual exhaustion marker genes analyzed at the T1 timepoint by healthy donors in green (N=3), Id-KLH treated patients in blue (N=7), and KLH treated patients in red (N=8). The Dunn's multiple comparisons test was employed to determine adjusted p values indicated for comparisons between the Id-KLH treatment, KLH, and healthy donor groups.

Supplementary Table 1. 36 up-regulated genes list

| gene                             | description                                            | Log2 (FC) | P-value<br>FDR |
|----------------------------------|--------------------------------------------------------|-----------|----------------|
| <b>PYCARD</b>                    | PYD And CARD Domain Containing                         | 4.69      | 0.0001         |
| <b>PPBP</b>                      | Pro-Platelet Basic Protein                             | 4.49      | 0.004          |
| <b>CCR5</b>                      | C-C Motif Chemokine Receptor 5                         | 4.41      | 0.022          |
| <b>CISH</b>                      | Cytokine Inducible SH2 Containing Protein              | 4.22      | 0.001          |
| <b>KLRF1</b>                     | Killer Cell Lectin Like Receptor F1                    | 3.58      | 0.025          |
| <b>TCF4</b>                      | Transcription Factor 4                                 | 3.54      | 0.001          |
| <b>KLRC2</b>                     | Killer Cell Lectin Like Receptor C2                    | 3.47      | 0.011          |
| <b>KLRC3</b>                     | Killer Cell Lectin Like Receptor C3                    | 3.33      | 0.033          |
| <b>PECAM1</b>                    | Platelet And Endothelial Cell Adhesion Molecule 1      | 3.00      | 0.000          |
| <b>CYBB</b>                      | Cytochrome B-245 Beta Chain                            | 2.75      | 0.010          |
| <b>CMKLR1</b>                    | Chemerin Chemokine-Like Receptor 1                     | 2.73      | 0.015          |
| <b>SLAMF6</b>                    | SLAM Family Member 6                                   | 2.66      | 0.003          |
| <b>KIR_Activating_Subgroup_1</b> |                                                        | 2.56      | 0.007          |
| <b>KLRK1</b>                     | Killer Cell Lectin Like Receptor K1                    | 2.54      | 0.047          |
| <b>CD86</b>                      | CD86 Molecule                                          | 2.31      | 0.035          |
| <b>LILRA4</b>                    | Leukocyte Immunoglobulin Like Receptor A4              | 2.26      | 0.040          |
| <b>XCL1</b>                      | X-C Motif Chemokine Ligand 1                           | 2.18      | 0.012          |
| <b>B3GAT1</b>                    | Beta-1,3-Glucuronyltransferase 1                       | 2.05      | 0.028          |
| <b>KLRG1</b>                     | Killer Cell Lectin Like Receptor G1                    | 1.91      | 0.033          |
| <b>PAX5</b>                      | Paired Box 5                                           | 1.74      | 0.047          |
| <b>G6PD</b>                      | Glucose-6-Phosphate Dehydrogenase                      | 1.73      | 0.000          |
| <b>BCL2</b>                      | BCL2 Apoptosis Regulator                               | 1.67      | 0.0001         |
| <b>IL6R</b>                      | IL6R                                                   | 1.65      | 0.041          |
| <b>STAT6</b>                     | Signal Transducer And Activator Of Transcription 6     | 1.39      | 0.013          |
| <b>IFNAR1</b>                    | Interferon Alpha And Beta Receptor Subunit 1           | 1.24      | 0.034          |
| <b>TIRAP</b>                     | TIR Domain Containing Adaptor Protein                  | 1.21      | 0.032          |
| <b>PSMB10</b>                    | Proteasome 20S Subunit Beta 10                         | 1.06      | 0.000          |
| <b>BCAP31</b>                    | B Cell Receptor Associated Protein 31                  | 1.03      | 0.00001        |
| <b>TAP2</b>                      | Transporter 2, ATP Binding Cassette Subfamily B Member | 0.94      | 0.009          |
| <b>TNFSF12</b>                   | TNF Superfamily Member 12                              | 0.90      | 0.001          |
| <b>CD74</b>                      | CD74 Molecule                                          | 0.89      | 0.037          |
| <b>IKZF3</b>                     | IKAROS Family Zinc Finger 3                            | 0.87      | 0.042          |
| <b>IKZF2</b>                     | IKAROS Family Zinc Finger 2                            | 0.84      | 0.013          |
| <b>ITGAL</b>                     | Integrin Subunit Alpha L                               | 0.82      | 0.004          |
| <b>JAK3</b>                      | Janus Kinase 3                                         | 0.60      | 0.009          |
| <b>NOD1</b>                      | Nucleotide Binding Oligomerization Domain Containing 1 | 0.59      | 0.050          |



Supplementary Table 2. 29 down-regulated genes list

| gene            | description                                        | Log2(FC) | P-value<br>FDR |
|-----------------|----------------------------------------------------|----------|----------------|
| <b>ILF3</b>     | Interleukin Enhancer Binding Factor 3              | -0.58    | 0.038          |
| <b>CTNNB1</b>   | Catenin Beta 1                                     | -0.68    | 0.003          |
| <b>CD5</b>      | CD5 Molecule                                       | -0.82    | 0.000          |
| <b>CEBPB</b>    | CEBPB                                              | -0.82    | 0.038          |
| <b>SMAD5</b>    | SMAD Family Member 5                               | -0.90    | 0.011          |
| <b>LGALS3</b>   | Galectin 3                                         | -0.93    | 0.047          |
| <b>ITGAE</b>    | Integrin Subunit Alpha E                           | -1.00    | 0.001          |
| <b>BCL10</b>    | BCL10 Immune Signaling Adaptor                     | -1.01    | 0.032          |
| <b>ATG16L1</b>  | Autophagy Related 16 Like 1                        | -1.02    | 0.006          |
| <b>ATG5</b>     | Autophagy Related 5                                | -1.03    | 0.000          |
| <b>CXCR4</b>    | C-X-C Motif Chemokine Receptor 4                   | -1.06    | 0.005          |
| <b>SOCS1</b>    | Suppressor Of Cytokine Signaling 1                 | -1.07    | 0.050          |
| <b>STAT3</b>    | Signal Transducer And Activator Of Transcription 3 | -1.17    | 0.000          |
| <b>BCL3</b>     | BCL3 Transcription Coactivator                     | -1.22    | 0.032          |
| <b>NFIL3</b>    | Nuclear Factor, Interleukin 3 Regulated            | -1.22    | 0.026          |
| <b>PSMD7</b>    | Proteasome 26S Subunit, Non-ATPase 7               | -1.23    | 0.007          |
| <b>RELA</b>     | RELA Proto-Oncogene, NF-KB Subunit                 | -1.34    | 0.025          |
| <b>PRDM1</b>    | PR/SET Domain 1                                    | -1.36    | 0.009          |
| <b>PSMC2</b>    | Proteasome 26S Subunit, ATPase 2                   | -1.38    | 0.033          |
| <b>C1R</b>      | Complement C1r                                     | -1.41    | 0.038          |
| <b>TRAF4</b>    | TNF Receptor Associated Factor 4                   | -1.54    | 0.007          |
| <b>NFKB1</b>    | Nuclear Factor Kappa B Subunit 1                   | -1.58    | 0.013          |
| <b>BCL6</b>     | BCL6 Transcription Repressor                       | -1.61    | 0.013          |
| <b>IFNGR1</b>   | Interferon Gamma Receptor 1                        | -1.67    | 0.004          |
| <b>MAPKAPK2</b> | MAPK Activated Protein Kinase 2                    | -1.74    | 0.003          |
| <b>ZEB1</b>     | Zinc Finger E-Box Binding Homeobox 1               | -1.86    | 0.028          |
| <b>RELB</b>     | RELB Proto-Oncogene, NF-KB Subunit                 | -2.17    | 0.008          |
| <b>DUSP4</b>    | Dual Specificity Phosphatase 4                     | -2.73    | 0.004          |
| <b>IL2</b>      | Interleukin 2                                      | -3.04    | 0.004          |
